# Supplementary material
Source: PubMed Central journal article supplement (PMC2910613)
Supplement: blood-2009-12-257154_1.pdf [file blood-2009-12-257154_1.pdf]

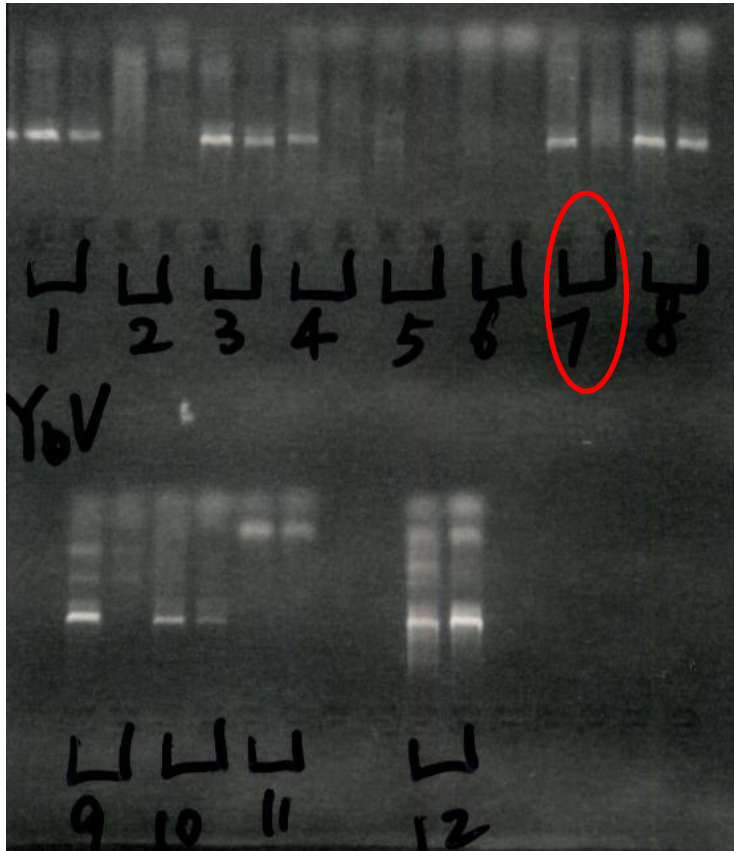

**Figure S1. Gene expression analysis of KS-SLK cell versus endothelial cell by subtractive hybridization.** Total RNA was extracted from KS-SLK cells (tester) and human umbilical vein endothelial cells (driver). cDNAs were synthesized, and then digested with Dpn II and ligated to Bgl II adaptors. The amplicons were made by PCR amplification. After three rounds of hybridization/selection/amplification, the isolated amplified products in the KS-SLK cells were cloned and sequenced. RT-PCR was performed to confirm the increased expression of the Axl gene (Number 7 in red circle) and PCR products were subjected to electrophoresis on a 2% agarose gel. For each gene, PCR product amplified from SLK cDNA was shown on the left and PCR product amplified from endothelial cell cDNA was shown on the right.

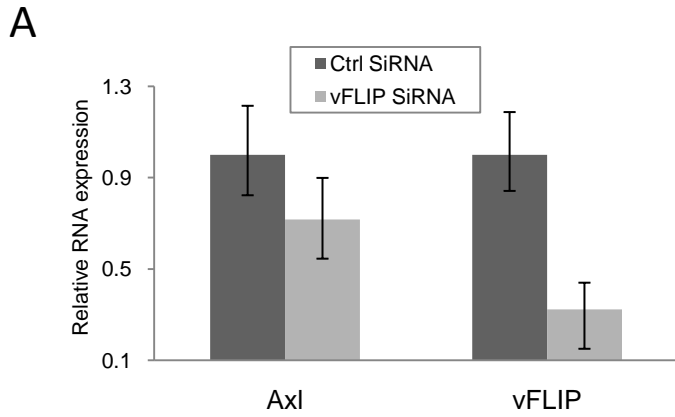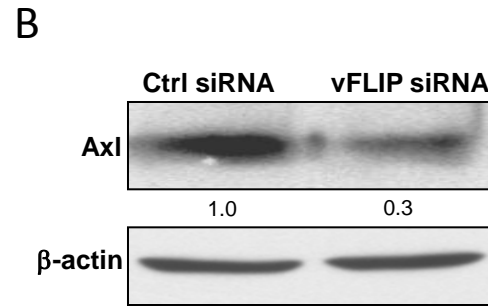

**Figure S2. Knockdown of vFLIP reduces Axl level and cell growth in LTC cells.** LTC was transfected with 50nM control siRNA or vFLIP siRNA for 72 hours. (A) RNA was isolated and subjected to quantitative RT-PCR. Relative RNA expression level was normalized to  $\beta$ -actin level. (B) Whole cell lysates were subjected to Western blot. Relative Axl protein expression was quantified by Image J, normalized to  $\beta$ -actin, and shown below the panel. (C) MTT assay was performed to analyze the effect of vFLIP siRNA on LTC cell growth. vFLIP siRNA was synthesized from USC core facility, the sense strand sequence is: 5'-GUGGUAUUGUCCUCCUAATT-3'.

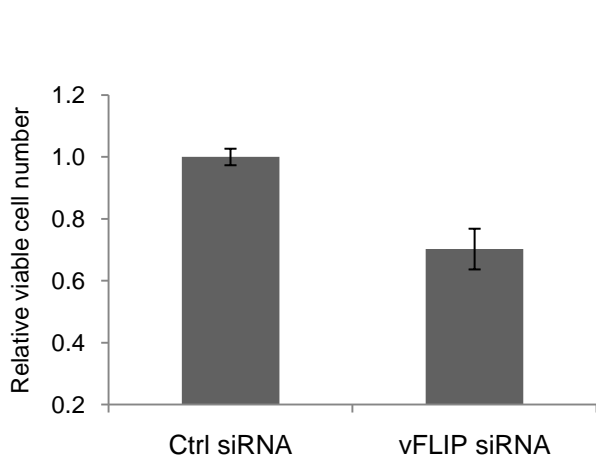

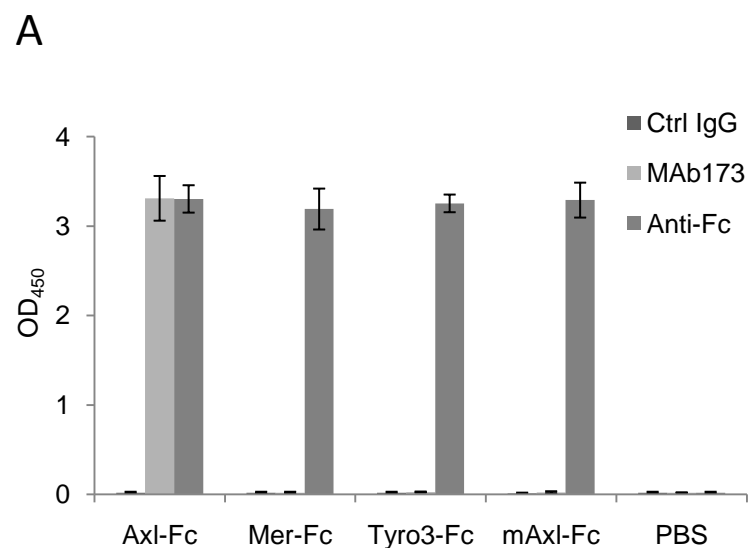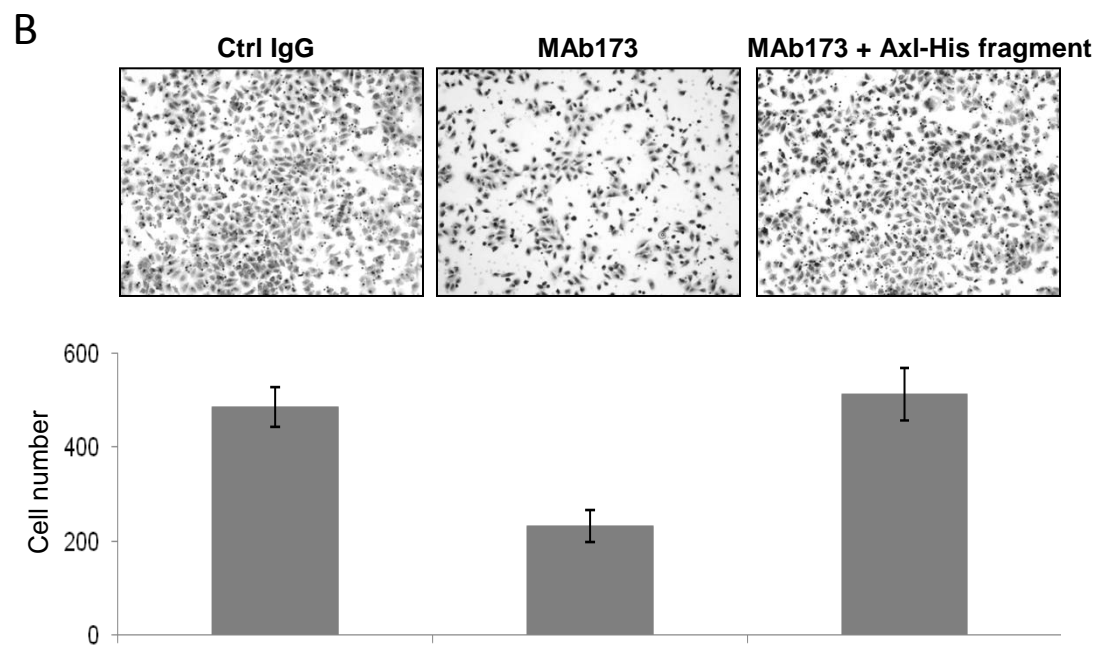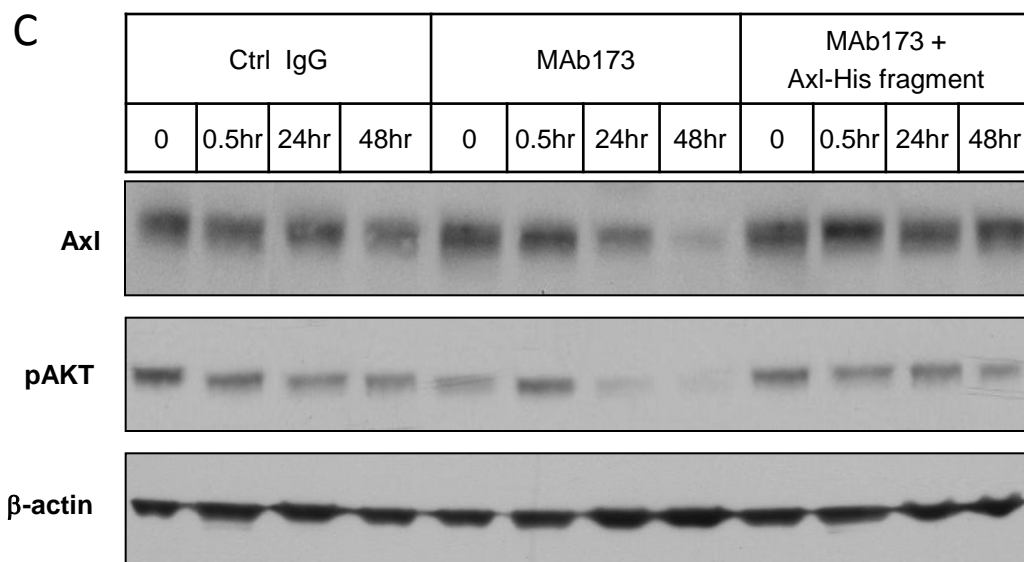

**Figure S3. Specificity of MAb173.** (A) Experiment was performed same as in Figure 5F except the proteins applied were Axl-Fc, Mer-Fc, Tryo3-Fc, and mAxl-Fc (all from RnD systems except Axl-Fc). Anti-Fc polyclonal antibody (Rockland Inc.) was used to ensure the presence of Fc fusion proteins. (B) Experiment was performed same as in Figure 4E except that MAb173 (4ug/ml) was pre-incubated with 20ug/ml soluble Axl-His protein (aa 1-442) for 30min before application onto KS-IMM cells. Control IgG and MAb173 alone were used as control. (C) MAb173 (4ug/ml) was pre-incubated with soluble Axl-His protein (20ug/ml) for 30min, and then incubated with LTC. Control IgG and MAb173 alone were used as control. Cells were treated for various times and then harvested. Whole cell lysates were subjected to Western blot with Axl, pAKT, and  $\beta$ -actin antibodies.
